1 **Evaluating Predictive Value of *Schistosoma mansoni* Prevalence and**  
2 **Infection Intensity in School-Age Children in Estimating**  
3 **Community-Wide Prevalence in Siaya County, Western Kenya**

4

5 Dollycate Wanja<sup>1,3\*¶</sup>, Maurice R. Odier<sup>2, 3</sup>, Emmy A. Kavere<sup>3</sup>, Geoffrey Muchiri<sup>3</sup>, Shehu Shagari Awandu<sup>1</sup>

6

7 <sup>1</sup> Department of Biomedical Sciences, Jaramogi Oginga Odinga University of Science and Technology,  
8 Bondo, Kenya

9 <sup>2</sup> Centre for Global Health and Research, Kenya Medical Research Institute, /, Kisumu, Kenya

10 <sup>3</sup> Safe Water and AIDS Project, Kisumu, Kenya

11

12

13 \*Corresponding author

14 E-mail: [wanjadollycate@gmail.com](mailto:wanjadollycate@gmail.com) (DW)

15

16

17

18

## 19 **Abstract**

### 20 **Background**

21 Various milestones have been set targeting the elimination of schistosomiasis with the vision of “a world free  
22 of schistosomiasis” including the 2020 and 2025 goals. Despite the increased control and prevention efforts,  
23 schistosomiasis still affects many people, partly because treatment doesn’t cover all at-risk populations.  
24 Preventive chemotherapy (PC), the cornerstone of control interventions is primarily inclined toward school-  
25 age children (SAC), whose prevalence also informs interventions for other age groups in the community.  
26 Whereas prevalence in SAC has been shown to be a good indicator of the prevalence in other age groups, it  
27 remains to be seen as if this is not true in different epidemiological settings and risk areas.

### 28 **Methods**

29 This study evaluated the predictive value of schistosomiasis prevalence among SAC in estimating community-  
30 wide prevalence in Siaya County, Kenya. A single stool sample was collected from participants aged 2-50  
31 years. Stool samples were collected from preschool-age children (2-6 years), SAC (7-14 years), adolescents  
32 (15 to <18 years), and adults ( $\geq 18$ -50 years) in a cross-sectional survey. The prevalence and intensity of  
33 *Schistosoma mansoni* infection were determined using the Kato-Katz technique (single stool, 4 slides) and  
34 compared across the age groups and risk categories (low  $>0$  to  $<10\%$ ; moderate  $\geq 10\%$  to  $<50\%$ ; and high  
35 ( $\geq 50\%$ ).

### 36 **Results**

37 Of the 1,814 participants sampled, 25.6% (95% CI: 23.7-27.7) were infected with *S. mansoni*. There was no  
38 significant difference between the mean egg intensity of *S. mansoni* in SAC compared to the other age groups.  
39 There was a strong positive correlation between SAC prevalence and intensity and community-wide

40 prevalence and intensity;  $r_s = 0.8$ ,  $P < 0.001$ , and  $r_s = 0.6$ ,  $P < 0.001$  respectively. A positive relationship between  
41 the overall *S. mansoni* prevalence and *S. mansoni* prevalence in SAC was observed. The regression analysis  
42 indicated that SAC prevalence/intensity can be used to predict overall *S. mansoni* prevalence/intensity. In  
43 terms of age groups, it can predict in all age groups but adolescents.

## 44 **Conclusions**

45 In this setting, generally, the prevalence of *S. mansoni* among SAC was a good predictor of the prevalence in  
46 other age groups and the overall (all age groups combined) prevalence. However, in terms of risk strata SAC  
47 data was only a good predictor of overall prevalence and intensity only in the moderate risk stratum. These  
48 findings suggest that *S. mansoni* prevalence and intensity among SAC are valid for community sampling  
49 purposes and informing interventions including MDA at the community level.

## 50 **Introduction**

51 Schistosomiasis (Bilharzia) is caused by parasitic flatworms of the genus  
52 *Schistosoma* and affects approximately 220 million people worldwide with 90% of the burden concentrated  
53 in sub-Saharan Africa (SSA) (1). According to the World Health Organization (WHO), approximately 652  
54 million people are at risk of the infection with about 200,000 deaths being reported annually. This infection  
55 exerts a great health and financial burden on the economies affected (2). In Kenya the disease is endemic in  
56 62 out of 290 sub-counties and infects approximately 9 million people and about 17 million are at risk (3).  
57 The 3 main endemic regions are the coastal region (*Schistosoma haematobium*), parts of central and lower  
58 eastern areas (both *Schistosoma mansoni* and *Schistosoma haematobium*), and Lake Victoria basin area  
59 (mainly *Schistosoma mansoni*).

60 Success in schistosomiasis control is widely recorded in many countries with  
61 significant decrease in both prevalence and infection levels (4). However, in SSA this enervating infection

62 remains a burden due to various factors that are responsible for continuous and persistent transmission. These  
63 include amongst others climatic changes, occupational activities, and proximity to water bodies (2). This  
64 infection is more prevalent in poor rural settings where fishing and agriculture are the main occupations (5).  
65 Poor water, sanitation and hygiene (WASH) is one of the key factors affecting the transmission of  
66 schistosomiasis. Infections occur during routine agricultural domestic occupational (like washing, bathing and  
67 fetching water) and recreational activities such as swimming, etc. These activities expose individuals to waters  
68 infested with the intermediate host (snail). School-age children (SAC), adolescents, women and young adults  
69 carry the greatest burden of morbidity and mortality associated with this infection(6-8). Equally, young  
70 children under 5 years are exposed especially in endemic regions. This mainly occurs when caregivers carry  
71 them along to the waterbodies (9, 10).

72 The WHO 2011 preventive chemotherapy (PC) strategy recommends that data from  
73 SAC can be used to assess community prevalence and that mass drug administration (MDA) should be  
74 conducted based on this information (11, 12). To date, monitoring and treatment of schistosomiasis is based  
75 on data from SAC only and very little attention is given to these other groups who are equally at risk.  
76 Integrating other age groups into the control programs will help accelerate the progress of control and  
77 elimination of schistosomiasis (13). The global community discusses strategies for incorporating other age  
78 groups especially adults and pre-school age children (PSAC) into treatment and monitoring plans. However,  
79 one of the main questions that remain unanswered is whether the WHO recommended prevalence among SAC  
80 is a good predictor of prevalence in other age groups in different epidemiological settings with varying risks  
81 of transmission. Control strategies for schistosomiasis have largely relied on prevalence data from SAC,  
82 which has also selectively excluded other at-risk groups such as PSAC and adults from interventions. This  
83 systematic exclusion of other at-risk groups contributes to the thriving of reservoirs of infection which will  
84 hamper the achievement of the WHO 2030 global elimination targets for schistosomiasis (14, 15).

85                             Although WHO recommends that prevalence in SAC can be used to infer  
86 prevalence in other age groups (11, 16, 17), this was not the case for one other setting (18). This study aimed  
87 at evaluating a strategy that can be used to quantify the prevalence and intensity of schistosomiasis for other  
88 age groups and the community as a whole using a predictive index from SAC data and also in different risk  
89 regions (low, moderate, and high).

## 90 **Materials and methods**

### 91 **Research population and design**

92 The cross-sectional study was carried out in Siaya County, bordering Lake Victoria in western Kenya. The  
93 region is endemic for schistosomiasis, with an inverse relationship between the prevalence of infection and  
94 distance from the lake (19). Many rounds of mass drug administration (MDA) with praziquantel have been  
95 conducted especially on SAC (20, 21). Considering that the main economic activities in the area are fishing  
96 and agriculture, other age groups such as adolescents and adults and adolescents are exposed to infection. In  
97 addition, young children (under 5 years) are infected when their caregivers carry them along to the water  
98 bodies during domestic chores such as laundry.

### 99 **Sampling procedure and sample size determination**

100 Stratified sampling was used to classify the eligible population into 4 strata depending on age group (PSAC  
101 2-6 years, SAC 7-14 years, adolescent 15-18 years & adults >18 years). Study villages were divided into 3  
102 risk strata according to the WHO-defined risk thresholds for schistosomiasis (low risk >0 to <10%, moderate  
103 risk  $\geq$ 10% to <50%, and high risk  $\geq$ 50%). The survey was conducted in 29 purposively selected villages. The  
104 total estimated population (N) per age group in these selected villages is 870 (an average of 30 per age group  
105 per village). A design effect (DEFF) of 1.58 (22) was applied.

106 Slovin's 1960 formula (23) was used to calculate the sample size for each age group per village with an  
107 expected refusal rate of 15%. This gave  $n = 498$  participants per age group (giving approximately 17 per age  
108 group per village). Before data collection, consent/assent was obtained for each participant. Parental/guardian  
109 consent was also obtained for each child. Participants were excluded from the study if they didn't provide  
110 assent or consent or were observably ill or had an underlying medical condition, as judged by the study nurse.

## 111 **Data collection instruments**

112 Data was collected using specially designed forms with the Commcare application (Dimagi Inc.) installed on  
113 Android smartphones which was then uploaded to a dedicated Commcare server. Laboratory data were  
114 recorded in a lab booklet/questionnaire and later entered via smartphones (Commcare application) into the  
115 same database.

## 116 **Reliability, validity and quality control**

117 To ensure reliability, stool sample evaluation was performed by trained microscopists who were blinded to  
118 the villages where the samples were collected. To warrant the validity of the instruments, the questionnaire  
119 (developed in the Commcare application) was designed taking into account validation and logical aspects,  
120 especially for questions involving skip patterns. In addition, the questions were administered in a simple way  
121 for ease of understanding by participants. To improve diagnostic sensitivity for the Kato-Katz technique, 4  
122 slides were prepared from each stool sample. Eggs in stool samples were counted by two independent  
123 microscopists and any discrepancy in the results of the two was reconciled by comparing them to the results  
124 of a third independent microscopist.

## 125 **Stool sample collection and processing**

126 A single stool sample was collected from each participant. The stool samples were tested using the Kato- Katz  
127 technique (duplicate 41.7 mg fecal) for detection of *S. mansoni*. Four slides were prepared from the single  
128 stool sample and the slides were allowed to clear for about 24 hours before microscopic examination. The  
129 laboratory technicians counted the number of eggs and recorded them in the lab booklet. This data was then  
130 entered into the Commcare application using smartphones. At the analysis level, the intensity of *S. mansoni*  
131 was enumerated and expressed as eggs per gram (epg) of feces. Positive participants were grouped into  
132 intensity levels, low(1-99epg), moderate (100-399epg), and heavy( $\geq 400$ epg).

### 133 **Data analysis**

134 Data cleaning and analysis were done using STATA version 14.0 (STATA Corp. LP., College Station, TX,  
135 USA). The normality test was conducted using the Shapiro-Wilk test and histogram plots. The arithmetic  
136 means egg counts calculated from the 4 slides (24) data were multiplied by 24 to convert the egg counts to  
137 eggs per gram (epg). For each participant, stool results were used to determine the presence of *S. mansoni* and  
138 its intensity. For each village, the *S. mansoni* prevalence, and arithmetic mean (AM) epg were calculated, as  
139 well as the prevalence for each age group. Villages were classified into risk strata according to the prevalence  
140 of *S. mansoni* using the WHO recommended criteria (low risk  $>0$  to  $<10\%$ , moderate risk  $\geq 10\%$  to  $<50\%$ , and  
141 high risk  $\geq 50\%$ ) and analysis to come up with a regression equation conducted for each stratum. Kruskal  
142 Wallis test was used to compare the prevalence of the 4 age categories and a post hoc test (Dunnnett's test) was  
143 conducted to compare prevalence in SAC with each of the other 3 categories. Spearman's correlation ( $r_s$ )  
144 analysis was conducted, and scatter plots were plotted to illustrate the relationship between overall prevalence  
145 and intensity as a function of SAC prevalence and intensity. Linear regression analysis was conducted to come  
146 up with a predictive model  $Y = a + bX$  (where Y is overall prevalence/intensity or prevalence/intensity of other  
147 age groups and X = prevalence/intensity of school-age children). All statistical tests and confidence intervals  
148 were conducted at a 5% level of significance.

## 149 **Ethical approvals**

150 Ethical approval for this study was obtained from the Board of Postgraduate Studies of Jaramogi Oginga  
151 Odinga University of Science and Technology (H153/4268/2019). This study was nested within a larger study  
152 whose ethical approval was obtained from the Maseno University Ethics Review Committee  
153 (MSU/DRPI/MUERC/00675/19). Additional approval for the larger study was obtained from the Kenya  
154 National Commission for Science, Technology and Innovation (NACOSTI/P/75695/30230). Parents and  
155 participants were provided with information sheets detailing the purpose of the study and what to expect.  
156 Written informed consent by parents or guardians and verbal assent by participating children were obtained  
157 before enrolment in the study.

## 158 **Results**

159 A total of 29 villages were involved in the study with 1,814 participants enrolled. An almost even proportion  
160 by gender was represented, 45% (818) for males and 55% (996) for females. The mean age was 17.9 years.  
161 The enrollment was 23.7% (430) for PSAC, 27.7% (502) for SAC, 21.6% (392) for adolescents, and 27.0%  
162 (490) for adults.

163 The helminth egg count data was tested for normality before analysis and non-parametric tests were  
164 subsequently employed for analysis.

## 165 **Overall prevalence and intensity of helminth infections**

166 Overall, 30.5% (548) of the participants were infected either with *S. mansoni* or one of the soil-transmitted  
167 helminths (STH), while 18.0% (324) of the participants were infected with one or more STH species. The  
168 most prevalent helminth infection among the participants was *S. mansoni* 25.6% (465) as shown in (**Table**  
169 **1**).



170 **Table 1. Overall (all age groups combined) prevalence and intensity of infection for *Schistosoma***  
 171 ***mansoni* and soil-transmitted helminths (STH) in Siaya county, western Kenya**

| Species<br>Infection                  | Intensity Threshold                 |       |          |       | Prevalence<br>Intensity(arithmetic<br>mean epg ± SD) |
|---------------------------------------|-------------------------------------|-------|----------|-------|------------------------------------------------------|
|                                       | Overall<br>Prevalence %,<br>(Range) | Light | Moderate | Heavy |                                                      |
| Any helminth                          | 30.5 (28.4-32.6)                    | 21.3  | 5.5      | 3.3   |                                                      |
| <i>S. mansoni</i>                     | 25.6 (23.7-27.7)                    | 16.9  | 5.4      | 3.3   | 215.4±628.8                                          |
| Any STH                               | 18.0(16.3-19.9)                     | 17.9  | 0.1      | 0.0   |                                                      |
| Hookworms                             | 0.1(0.02-0.4)                       | 0.1   | 0.0      | 0.0   | 102.0±84.9                                           |
| <i>Ascaris</i><br><i>lumbricoides</i> | 0.2(0.00-0.1)                       | 0.1   | 0.1      | 0.0   | 4536.0±7742.5                                        |
| <i>Trichuris</i><br><i>trichiura</i>  | 17.9(16.2-19.7)                     | 17.8  | 0.1      | 0.0   | 24.7±207.5                                           |

172  
 173 The proportions of individuals infected with multiple helminth species were slightly higher than those  
 174 infected with *S. mansoni* only.

175 **Prevalence and intensity of *Schistosoma mansoni* by age group**

176 We assessed the overall prevalence and the prevalence for each *S. mansoni* infection intensity level segregated  
 177 by age group. Most of the *S. mansoni* infections were of light intensity (100-399 epg, with heavy-intensity  
 178 infections (≥400 epg) accounting for the least proportion (**Table 2**). The prevalence for light and moderate

179 infection levels was highest among adults followed by adolescents. However, the mean eggs per gram were  
 180 highest among Preschool-age children 353.0(88.7-617.2).

181 **Table 2. Prevalence and intensity levels of *Schistosoma mansoni* per age group**

|            | Positive   | Light      | Moderate      | Heavy       |                     |
|------------|------------|------------|---------------|-------------|---------------------|
| Age group  | n (%)      | (1-99 epg) | (100-399 epg) | (>=400 epg) | Mean epg* (95% CI)  |
| PSAC       | 83 (19.3)  | 12.8       | 3.0           | 3.3         | 353.0 (88.7-617.2)  |
| SAC        | 112 (22.3) | 14.1       | 6.0           | 2.2         | 215.3 (113.0-317.6) |
| Adolescent | 114 (29.1) | 19.6       | 5.4           | 4.1         | 173.1 (116.5-229.7) |
| Adults     | 156 (31.8) | 21.0       | 6.9           | 3.9         | 172.5 (116.1-228.8) |

182

183 **Predictive value of *Schistosoma mansoni* prevalence and egg intensity in**  
 184 **school-age children to that of PSAC, adolescents, and adults in low, moderate,**  
 185 **and high-risk communities**

186 Villages were categorized into 3 risk strata (low-risk >0 to <10%, moderate-risk ≥10% to <50%, and high-  
 187 risk ≥50%). There were 5, 20, and 4 villages in the low, moderate, and high risk strata, respectively.

188 As expected, the prevalence of *S. mansoni* was highest in the high-risk areas, with an overall prevalence of  
 189 63.2%. Results of Dunnett’s test revealed no statistically significant difference between the mean egg intensity  
 190 (epg) of SAC compared with that of PSAC, adolescents or adults, all with P > 0.05 (**Table 3**).

191 **Table 3. Pairwise comparison of mean epg for SACs versus other age groups**

| Age group | Contrast | Std. Err. | t | P value | 95% CI |
|-----------|----------|-----------|---|---------|--------|
|-----------|----------|-----------|---|---------|--------|

---

|                   |      |      |     |       |              |
|-------------------|------|------|-----|-------|--------------|
| SAC vs PSAC       | 19.2 | 21.8 | 1.0 | 0.704 | (-31.8-70.4) |
| SAC vs Adolescent | 2.3  | 22.3 | 0.1 | 0.999 | (-50.1-54.7) |
| SAC vs Adults     | 6.9  | 21.0 | 0.3 | 0.977 | (-42.5-56.3) |

---

192

## 193 **Correlation analysis**

194 There was a positive relationship between the overall *S. mansoni* prevalence and *S. mansoni* prevalence in  
195 school-age children ( $r_s = 0.8$ ,  $P < 0.001$ ) (**S1 Fig**). There was also a positive linear relationship between  
196 community-wide (all groups combined) mean egg intensity and SAC mean egg intensity ( $r_s = 0.6$ ,  $P < 0.001$ )  
197 Spearman's rank correlation analysis was conducted to assess the association between village-level  
198 prevalence and mean egg intensity for SAC and other age groups. There was a positive correlation between  
199 *S. mansoni* prevalence in SAC and that of other individual age groups as follows; PSAC ( $r_s = 0.5$ ,  $P < 0.001$ ),  
200 adolescents ( $r_s = 0.6$ ,  $P < 0.001$ ), and marginally significant for adults ( $r_s = 0.4$ ,  $P = 0.06$ ). In terms of risk  
201 strata, SAC prevalence had a positive correlation with overall prevalence (all groups combined) only in the  
202 moderate risk strata ( $r_s = 0.7$ ,  $P < 0.001$ ). There was a positive relationship between *S. mansoni* mean egg  
203 intensity in SAC and overall mean egg intensities; PSAC ( $r_s = 0.4$ ,  $P = 0.03$ ) and adults ( $r_s = 0.5$ ,  $P = 0.01$ )  
204 but not adolescents. A similar pattern was observed in the overall prevalence in the moderate and high  
205 prevalence strata; PSAC ( $r_s = 0.5$ ,  $P = 0.04$ ) and adults ( $r_s = 1.0$ ,  $P < 0.001$ ).

206 There was a strong positive correlation between SAC prevalence and intensity and community-wide  
207 prevalence and intensity;  $r_s = 0.8$ ,  $P < 0.001$  and  $r_s = 0.6$ ,  $P < 0.001$  for overall prevalence and intensity  
208 respectively.

209 There was a positive linear relationship between the prevalence of *S. mansoni* in SAC and that of other  
210 individual age groups. As illustrated in (**S2 Fig**).

## 211 Regression Analysis

212 Linear regression analysis was used to come up with a model that can predict the prevalence and intensity of  
 213 *S. mansoni* in SAC to the other age groups (PSAC, adolescents, and adults) and the overall community. This  
 214 analysis was conducted overall (all risk strata combined) and per risk strata (low, moderate and high). A  
 215 regression model of  $Y = a + bX$  where X is the prevalence of school-age children and Y is either the prevalence  
 216 of PSAC, adolescents, adults, or overall community prevalence.

217 **Table 4: Regression equations for overall prevalence and mean egg intensities**

|                                   | The regression equation for prevalence, P value | The regression equation for intensities, P value |
|-----------------------------------|-------------------------------------------------|--------------------------------------------------|
| Overall (all age groups combined) | $10.27 + 0.69SAC, P < 0.001$                    | $59.19 + 0.76SAC, P < 0.001$                     |
| PSAC (2-6years old)               | $6.69 + 0.59SAC, P < 0.001$                     | $42.97 + 1.06SAC, P = 0.006$                     |
| adolescents (15-17years old)      | $15.72 + 0.71SAC, P = 0.01$                     | $112.44 + 0.15SAC, P = 0.617$                    |
| adults ( $\geq 18$ years old)     | $23.81 + 0.36SAC, P = 0.038$                    | $78.32 + 0.51SAC, P = 0.001$                     |

218

219 Results from linear regression modeling are as in **Table 5** below.

220 **Table 5: Prevalence of *S. mansoni* infection in school-age children and their corresponding values in**  
 221 **other age groups according to the regression equations**

| SAC prevalence (%) | Overall community-wide prevalence (%) | PSAC (%) | Adolescents (%) | Adults (%) |
|--------------------|---------------------------------------|----------|-----------------|------------|
| 10                 | 17.17                                 | 12.59    | 22.82           | 27.41      |

|     |       |       |       |       |
|-----|-------|-------|-------|-------|
| 20  | 24.07 | 18.49 | 29.92 | 31.01 |
| 30  | 30.97 | 24.39 | 37.07 | 34.61 |
| 40  | 37.87 | 30.29 | 44.12 | 38.21 |
| 50  | 44.77 | 36.19 | 51.22 | 41.81 |
| 60  | 51.67 | 42.09 | 58.32 | 45.41 |
| 70  | 58.57 | 47.99 | 65.42 | 49.01 |
| 80  | 65.47 | 53.89 | 72.52 | 52.61 |
| 90  | 72.37 | 59.79 | 79.62 | 56.21 |
| 100 | 79.27 | 65.69 | 86.72 | 59.81 |

222

223 The above findings were all statistically significant, indicating that the prevalence of *S. mansoni* in school-  
 224 age children can be used to predict the prevalence of *S. mansoni* in PSAC, adolescents, adults, or the overall  
 225 community-wide. SAC mean egg intensity was also a predictor for mean egg intensity in PSAC, adults, and  
 226 the entire community but not for adolescents.

227 **Table 6: Regression equations for overall prevalence and mean egg intensities per risk strata**

|                                   | The regression equation for prevalence, P value | The regression equation for intensities, P value |
|-----------------------------------|-------------------------------------------------|--------------------------------------------------|
| <b>Low-risk stratum</b>           |                                                 |                                                  |
| Overall (all age groups combined) | 7.64 - 0.347SAC, P = 0.391                      | 34.03+ 0.79SAC, P = 0.403                        |
| PSAC (2-6years old)               | 15.02 - 1.04SAC, P = 0.494                      | 60.01 - 1.14SAC, P = 0.395                       |
| adolescents (15-17years old)      | 1.21 - 0.06SAC, P = 0.987                       | -15.24 + 3.01SAC, P = 0.001*                     |

|                                   |                              |                             |
|-----------------------------------|------------------------------|-----------------------------|
| adults ( $\geq 18$ years old)     | 16.02 - 1.50SAC, P = 0.092   | 22.48+ 0.55SAC, P= 0.528    |
| <b>Moderate-risk stratum</b>      |                              |                             |
| Overall (all age groups combined) | 16.91 - 0.379SAC, P = 0.012* | 76.35+ 0.49SAC, P <0.001*   |
| PSAC (2-6years old)               | 10.90 + 0.27SAC, P=0.180     | 88.23 + 0.38SAC, P = 304    |
| adolescents (15-17years old)      | 26.90 + 0.31SAC, P = 0.468   | 149.79 - 0.24SAC, P = 0.554 |
| adults ( $\geq 18$ years old)     | 37.47 - 0.25SAC, P = 0.449   | 92.48 + 0.12SAC, P = 0.079  |
| <b>High-risk stratum</b>          |                              |                             |
| Overall (all age groups combined) | 34.76 - 0.40SAC, P = 0.325   | -0.22 + 1.33SAC, P = 0.069  |
| PSAC (2-6years old)               | 56.17-0.004SAC, P = 0.998    | -389.18 + 3.26SAC, P = 192  |
| adolescents (15-17years old)      | 7.64 + 0.85SAC, P = 0.104    | 92.10 - 0.67SAC, P = 0.311  |
| adults ( $\geq 18$ years old)     | 60.51 - 0.05SAC, P=0.815     | 227.97 + 0.52SAC, P = 0.77  |

228

229 In terms of risk strata, school-age data was a good predictor for overall prevalence and intensity in the  
 230 moderate-risk regions (P = 0.012 and P < 0.001 respectively). It was also able to significantly predict the  
 231 intensity of *S. mansoni* among adolescents in low-risk regions (P = 0.001).

## 232 Discussion

233 This study was key in answering the question of whether SAC is a suitable reference group for  
 234 predicting community-wide prevalence and more so in different risk areas. Such a predictor should be

235 representative of the MDA target group and the entire community. School children are easily accessible from  
236 schools and this eases the process of sample collection. Both logistic and economic aspects need to be  
237 considered. Proper planning of control and intervention strategies for schistosomiasis requires information on  
238 community-level or local prevalence and mapping of the distribution of the disease. This information is critical  
239 for control programs. Whereas it is impractical and illogical to conduct assessment surveys on the infection  
240 in all possibly endemic communities, model-based statistics can help predict the prevalence and determine  
241 appropriate intervention master plans (25).

242 This study was conducted in Siaya County, a region that borders Lake Victoria. Previous studies have  
243 shown that these areas that border Lake Victoria are highly endemic for schistosomiasis (10, 26). In agreement  
244 with these studies, this study reported a significantly high prevalence of *S. mansoni* infection. However, the  
245 prevalence was marginally relatively higher among adolescents and adults as compared to other age groups,  
246 a pattern that was observed in other settings (27) (6). The slightly higher prevalence among adolescents and  
247 adults relative to SAC in the current study setting may be explained by differences in their daily activities and  
248 occupations that expose them to frequent water contact such as fishing, washing among others. For adults in  
249 particular, it may also be a result of the cumulative effects of years of exclusion from MDA conducted in  
250 Kenya by the National School-Based Deworming Programme (NSBDP) which only targets school-age  
251 children (28).

252 A positive linear relationship was observed between the prevalence and mean epg for SAC (7-15  
253 years) and that of the entire community (all age groups combined). Moreover, there was no significant  
254 difference in the mean epg for SAC and that of other individual age groups, and a strong positive correlation  
255 between the prevalence of *S. mansoni* among SAC and that of the overall community. The linear regression  
256 model also confirmed that indeed SAC is a good predictor for overall prevalence and mean intensities for  
257 each age group and the entire community. These findings add to the evidence that SAC is indeed a suitable

258 reference group and also confirm the WHO recommendation of using school-age children data to predict  
259 community-wide prevalence (29-31). In a study conducted in western Kenya, SAC (9-12 years) was a good  
260 predictor for community-wide prevalence and intensity of *S. mansoni* (11). Prevalence of *S. haematobium*  
261 among SAC (7-14 years) sufficiently estimated the community-wide prevalence in Mali (16). Similarly, a  
262 study conducted among 180,000 people from 3 municipalities in Brazil, found that the prevalence of  
263 schistosomiasis among children aged 7-14 years had a strong relationship with entire community prevalence  
264 (32). Another nationwide study by Guyatt revealed that SAC was a good and cost-effective predictive  
265 technique for community-wide prevalence that can be used to make intervention decisions not only at the  
266 district level but also at the national level (17). Additionally, another study conducted in an endemic area in  
267 Pernambuco reported that the prevalence of Schistosomiasis in SAC(6-15 years) is a suitable indicator for  
268 community prevalence(33).

269         There was a positive correlation between *S. mansoni* prevalence in SAC and that of other individual  
270 age groups but not significant for adults. In that regard this study's regression analysis per risk strata indicated  
271 that *S. mansoni* prevalence in SAC was only a good predictor in moderate-risk areas with prevalence ( $\geq 10\%$   
272 to  $< 50\%$ ) and not for low ( $> 0$  to  $< 10\%$ ,) and high-risk areas ( $\geq 50\%$ ). That concluded that SAC data wasn't a  
273 good predictor for adults and low and high-risk settings. Similar results were depicted in a study conducted  
274 in Nigeria (18) reporting that SAC was not an appropriate reference group for predicting prevalence among  
275 adults in high-risk regions where *S. mansoni* prevalence is  $\geq 50\%$ .

276         A limitation of this study is that the study was conducted in an area that has undergone several rounds  
277 of MDA targeting mainly SAC and no other age groups. It is therefore difficult to know if the findings can be  
278 inferred for an area where treatment has been provided across all age groups. Nevertheless, findings can be  
279 considered within the context and understanding that until recently, the recommended MDA strategy was  
280 premised on the fact that treatment is provided to a certain target group (in this case SAC), and that the benefits



281 are accrued to all others age groups living in that endemic area. It is therefore reasonable to assume that any  
282 benefits accrued to SAC as a result of treatment are also experienced in the other age groups, as has been  
283 demonstrated for PSAC and adults(34). Additionally, existing evidence shows that SAC prevalence can  
284 overestimate prevalence in other age groups in the community, the degree of overestimation being dependent  
285 on the parasite species and the intensity level of infection (17, 35). This study considered only one parasite  
286 species (*S. mansoni*) which is the dominant species in the study area and did not include *S. haematobium*.  
287 Therefore, findings may only be readily applicable to *S. mansoni* and may suggest the need for careful  
288 considerations among other things, local transmission dynamics including parasite species.

## 289 **Conclusion**

290 This study's findings showed that the *S. mansoni* prevalence and intensity among SAC (7-15 years) was  
291 comparable to other age groups in the same epidemiological settings as well as with the entire community (all  
292 age groups combined). SAC is a good predictor/reference group for predicting community-wide prevalence  
293 and can be used to inform the planning and implementation of control interventions such as MDA. However,  
294 in terms of risk areas (categorized as low, moderate, and high risk), SAC was only a good predictor for  
295 schistosomiasis in moderate-risk communities.

296 Where resources are limited, predictive regression models may be of great value in generating the much-  
297 needed prevalence data to inform control strategies. Importantly, additional studies are required in different  
298 epidemiological settings with varying risks (low, moderate, and high), to ascertain the utility of SAC  
299 prevalence in informing community-wide prevalence.

## 300 **Acknowledgments**

301 This research was supported by the Safe Water and Aids project/KEMRI-CDC. We thank our colleagues who  
302 provided great insights and expertise that greatly made this research a success. We would also like to thank  
303 the study participants for voluntarily agreeing to take part in the research.

## 304 **References**

- 305 1. WHO. Schistosomiasis, fact sheet no 115. Geneva: World Health Organization. 2014.
- 306 2. Adenowo AF, Oyinloye BE, Ogunyinka BI, Kappo AP. Impact of human schistosomiasis in sub-  
307 Saharan Africa. *Brazilian Journal of Infectious Diseases*. 2015;19(2):196-205.
- 308 3. Gichuki PM, Kepha S, Mulewa D, Masaku J, Kwoba C, Mbugua G, et al. Association between  
309 *Schistosoma mansoni* infection and access to improved water and sanitation facilities in Mwea, Kirinyaga  
310 County, Kenya. *BMC infectious diseases*. 2019;19(1):1-14.
- 311 4. Sokolow SH, Wood CL, Jones IJ, Swartz SJ, Lopez M, Hsieh MH, et al. Global assessment of  
312 schistosomiasis control over the past century shows targeting the snail intermediate host works best. *PLoS*  
313 *neglected tropical diseases*. 2016;10(7):e0004794.
- 314 5. WHO. A global brief on vector-borne diseases. World Health Organization; 2014.
- 315 6. Faust CL, Osakunor DN, Downs JA, Kayuni S, Stothard JR, Lamberton PH, et al. Schistosomiasis  
316 control: leave no age group behind. *Trends in parasitology*. 2020;36(7):582-91.
- 317 7. Nigo MM, Odermatt P, Salieb-Beugelaar GB, Morozov O, Battegay M, Hunziker PR. Epidemiology  
318 of *Schistosoma mansoni* infection in Ituri Province, north-eastern Democratic Republic of the Congo. *PLoS*  
319 *Neglected Tropical Diseases*. 2021;15(12):e0009486.
- 320 8. Mationg MLS, Tallo VL, Williams GM, Gordon CA, Clements AC, McManus DP, et al. The control  
321 of soil-transmitted helminthiases in the Philippines: the story continues. *Infectious Diseases of Poverty*.  
322 2021;10(1):1-26.

- 323 9. Kibira SPS, Ssempebwa JC, Ssenyonga R, Radloff S, Makumbi FE. Schistosomiasis infection in  
324 pre-school aged children in Uganda: a qualitative descriptive study to identify routes of exposure. BMC  
325 infectious diseases. 2019;19(1):1-10.
- 326 10. Nalugwa A, Olsen A, Tukahebwa M, Nuwaha F. Intestinal schistosomiasis among preschool  
327 children along the shores of Lake Victoria in Uganda. Acta tropica. 2015;142:115-21.
- 328 11. Mwinzi PN, Muchiri G, Wiegand RE, Omedo M, Abudho B, Karanja DM, et al. Predictive value of  
329 school-aged Children's schistosomiasis prevalence and egg intensity for other age groups in western Kenya.  
330 The American journal of tropical medicine and hygiene. 2015;93(6):1311-7.
- 331 12. WHO. Helminth control in school-age children: a guide for managers of control programmes: World  
332 Health Organization; 2011.
- 333 13. Faust CL, Osakunor DN, Downs JA, Kayuni S, Stothard JR, Lamberton PH, et al. Schistosomiasis  
334 control: leave no age group behind. Trends in Parasitology. 2020.
- 335 14. Fenwick A, Jourdan P. Schistosomiasis elimination by 2020 or 2030? International Journal for  
336 Parasitology. 2016;46(7):385-8.
- 337 15. Casulli A. New global targets for NTDs in the WHO roadmap 2021–2030. Public Library of Science  
338 San Francisco, CA USA; 2021. p. e0009373.
- 339 16. Traoré M, Maude GH, Bradley DJ. Schistosomiasis haematobia in Mali: prevalence rate in  
340 school-age children as index of endemicity in the community. Tropical Medicine & International Health.  
341 1998;3(3):214-21.
- 342 17. Guyatt H, Brooker S, Donnelly C. Can prevalence of infection in school-aged children be used as an  
343 index for assessing community prevalence? Parasitology. 1999;118(3):257-68.

- 344 18. Evans DS, King JD, Eigege A, Umaru J, Adamani W, Alphonsus K, et al. Assessing the WHO 50%  
345 prevalence threshold in school-aged children as indication for treatment of urogenital schistosomiasis in  
346 adults in central Nigeria. *The American journal of tropical medicine and hygiene*. 2013;88(3):441-5.
- 347 19. Handzel T, Karanja DM, Addiss DG, Hightower AW, Rosen DH, Colley DG, et al. Geographic  
348 distribution of schistosomiasis and soil-transmitted helminths in Western Kenya: implications for  
349 anthelmintic mass treatment. *The American journal of tropical medicine and hygiene*. 2003;69(3):318-23.
- 350 20. Shen Y, Wiegand RE, Olsen A, King CH, Kittur N, Binder S, et al. Five-Year Impact of Different  
351 Multi-Year Mass Drug Administration Strategies on Childhood *Schistosoma mansoni*–Associated  
352 Morbidity: A Combined Analysis from the Schistosomiasis Consortium for Operational Research and  
353 Evaluation Cohort Studies in the Lake Victoria Regions of Kenya and Tanzania. *The American journal of*  
354 *tropical medicine and hygiene*. 2019;101(6):1336.
- 355 21. Sircar AD, Mwinzi PN, Onkanga IO, Wiegand RE, Montgomery SP, Secor WE. *Schistosoma*  
356 *mansoni* mass drug administration regimens and their effect on morbidity among schoolchildren over a 5-  
357 year period—Kenya, 2010–2015. *The American journal of tropical medicine and hygiene*. 2018;99(2):362.
- 358 22. Tuhebwe D, Bagonza J, Kiracho EE, Yeka A, Elliott AM, Nuwaha F. Uptake of mass drug  
359 administration programme for schistosomiasis control in Koome Islands, Central Uganda. *PLoS One*.  
360 2015;10(4):e0123673.
- 361 23. Slovin E. Slovin’s formula for sampling technique. Retrieved July 21, 2021. 1960.
- 362 24. Katz N, Chaves A, Pellegrino J. A simple, device for quantitative stool thick-smear technique in  
363 schistosomiasis mansoni. *Revista do instituto de medicina tropical de São Paulo*. 1972;14(6):397-400.
- 364 25. Kabore A, Biritwum N-K, Downs PW, Soares Magalhaes RJ, Zhang Y, Ottesen EA. Predictive vs.  
365 empiric assessment of schistosomiasis: implications for treatment projections in Ghana. *PLoS Neglected*  
366 *Tropical Diseases*. 2013;7(3):e2051.

- 367 26. Siza JE, Kaatano GM, Chai J-Y, Eom KS, Rim H-J, Yong T-S, et al. Prevalence of schistosomes and  
368 soil-transmitted helminths and morbidity associated with schistosomiasis among adult population in Lake  
369 Victoria Basin, Tanzania. *The Korean journal of parasitology*. 2015;53(5):525.
- 370 27. Deribe K, Eldaw A, Hadziabduli S, Kailie E, Omer MD, Mohammed AE, et al. High prevalence of  
371 urinary schistosomiasis in two communities in South Darfur: implication for interventions. *Parasites &*  
372 *vectors*. 2011;4(1):1-5.
- 373 28. Mwandawiro C, Okoyo C, Kihara J, Simiyu E, Kepha S, Campbell SJ, et al. Results of a national  
374 school-based deworming programme on soil-transmitted helminths infections and schistosomiasis in Kenya:  
375 2012–2017. *Parasites & vectors*. 2019;12(1):1-18.
- 376 29. Montresor A, Crompton DW, Hall A, Bundy D, Savioli L, Organization WH. Guidelines for the  
377 evaluation of soil-transmitted helminthiasis and schistosomiasis at community level: a guide for managers  
378 of control programmes. World Health Organization; 1998.
- 379 30. WHO. Prevention and control of schistosomiasis and soil-transmitted helminthiasis: report of a  
380 WHO expert committee: World Health Organization; 2002.
- 381 31. Montresor A, Stoltzfus RJ, Albonico M, Tielsch JM, Rice AL, Chwaya HM, et al. Is the exclusion of  
382 children under 24 months from anthelmintic treatment justifiable? *Transactions of the Royal Society of*  
383 *Tropical Medicine and Hygiene*. 2002;96(2):197-9.
- 384 32. Rodrigues L, Wheeler J, Shier R, Guerra H, Pimenta F, e COSTA ML. Predicting the community  
385 prevalence of schistosomiasis mansoni from the prevalence among 7-to 14-year-olds. *Parasitology*.  
386 2000;121(5):507-12.
- 387 33. Pereira APB, Favre TC, Galvão AF, Beck L, Barbosa CS, Pieri OS. The prevalence of  
388 schistosomiasis in school-aged children as an appropriate indicator of its prevalence in the community.  
389 *Memorias do Instituto Oswaldo Cruz*. 2010;105:563-9.

390 34. Secor WE, Wiegand RE, Montgomery SP, Karanja DM, Odiere MR. Comparison of school-based  
391 and community-wide mass drug administration for schistosomiasis control in an area of western Kenya with  
392 high initial *Schistosoma mansoni* infection prevalence: a cluster randomized trial. *The American Journal of*  
393 *Tropical Medicine and Hygiene*. 2020;102(2):318.

394 35. Brooker S, Donnelly CA, Guyatt HL. Estimating the number of helminthic infections in the  
395 Republic of Cameroon from data on infection prevalence in schoolchildren. *Bulletin of the world Health*  
396 *Organization*. 2000;78:1456-65.

397

## 398 **Supporting Information**

399 S1 Fig. Scatter plot for overall prevalence and as a function of prevalence by village for school-age children

400 S1 Fig. Scatter plot for overall mean egg intensity as a function of mean egg intensity by village for school-  
401 age children

402 S2 Fig. *Schistosoma mansoni* prevalence between age groups in Siaya County, western Kenya

403

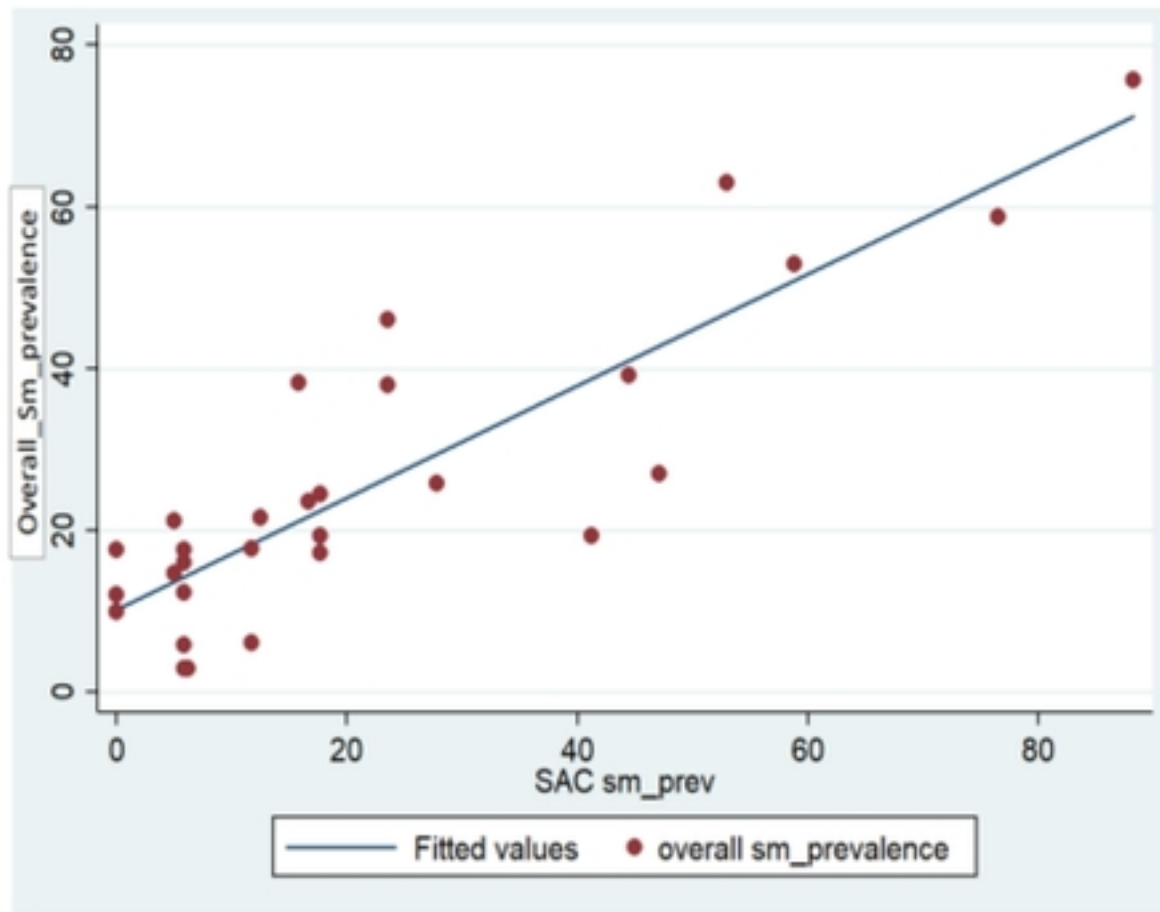

**Figure 1a: Scatter plot for overall prevalence and as a function of prevalence by village for school-age children**

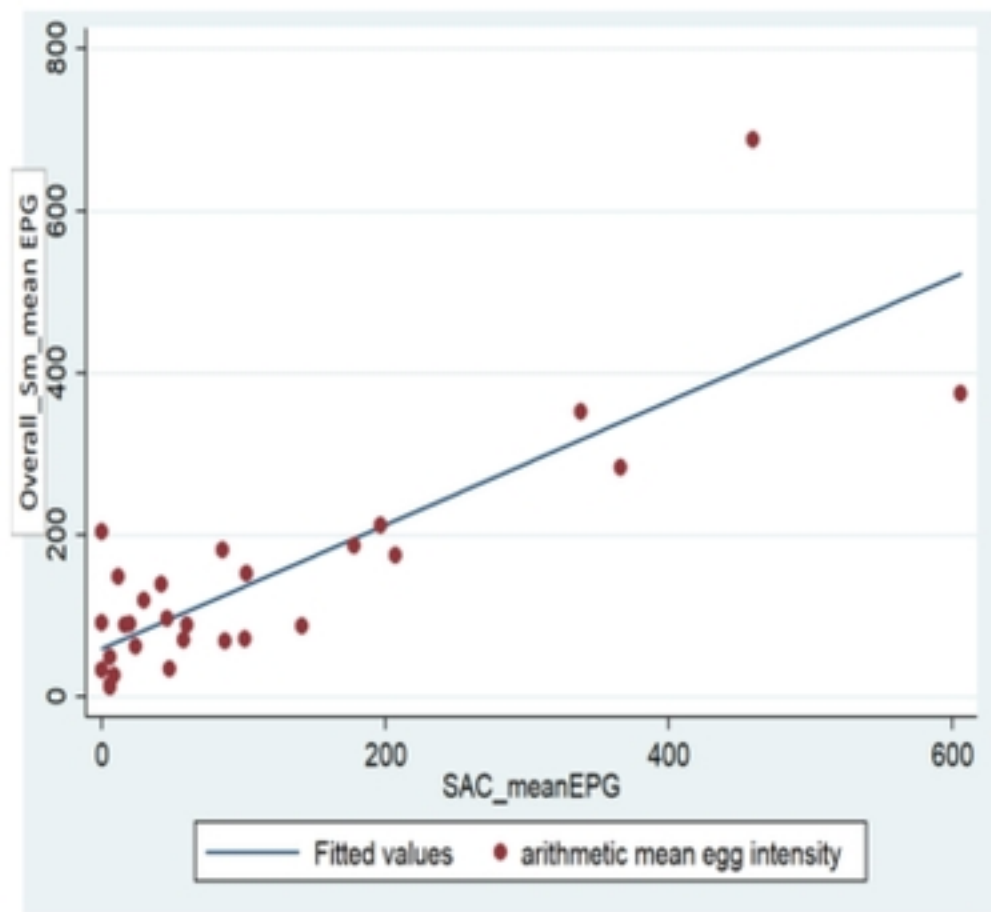

**Figure 1b: Scatter plot for overall mean egg intensity as a function of mean egg intensity by village for school-age children**

figure

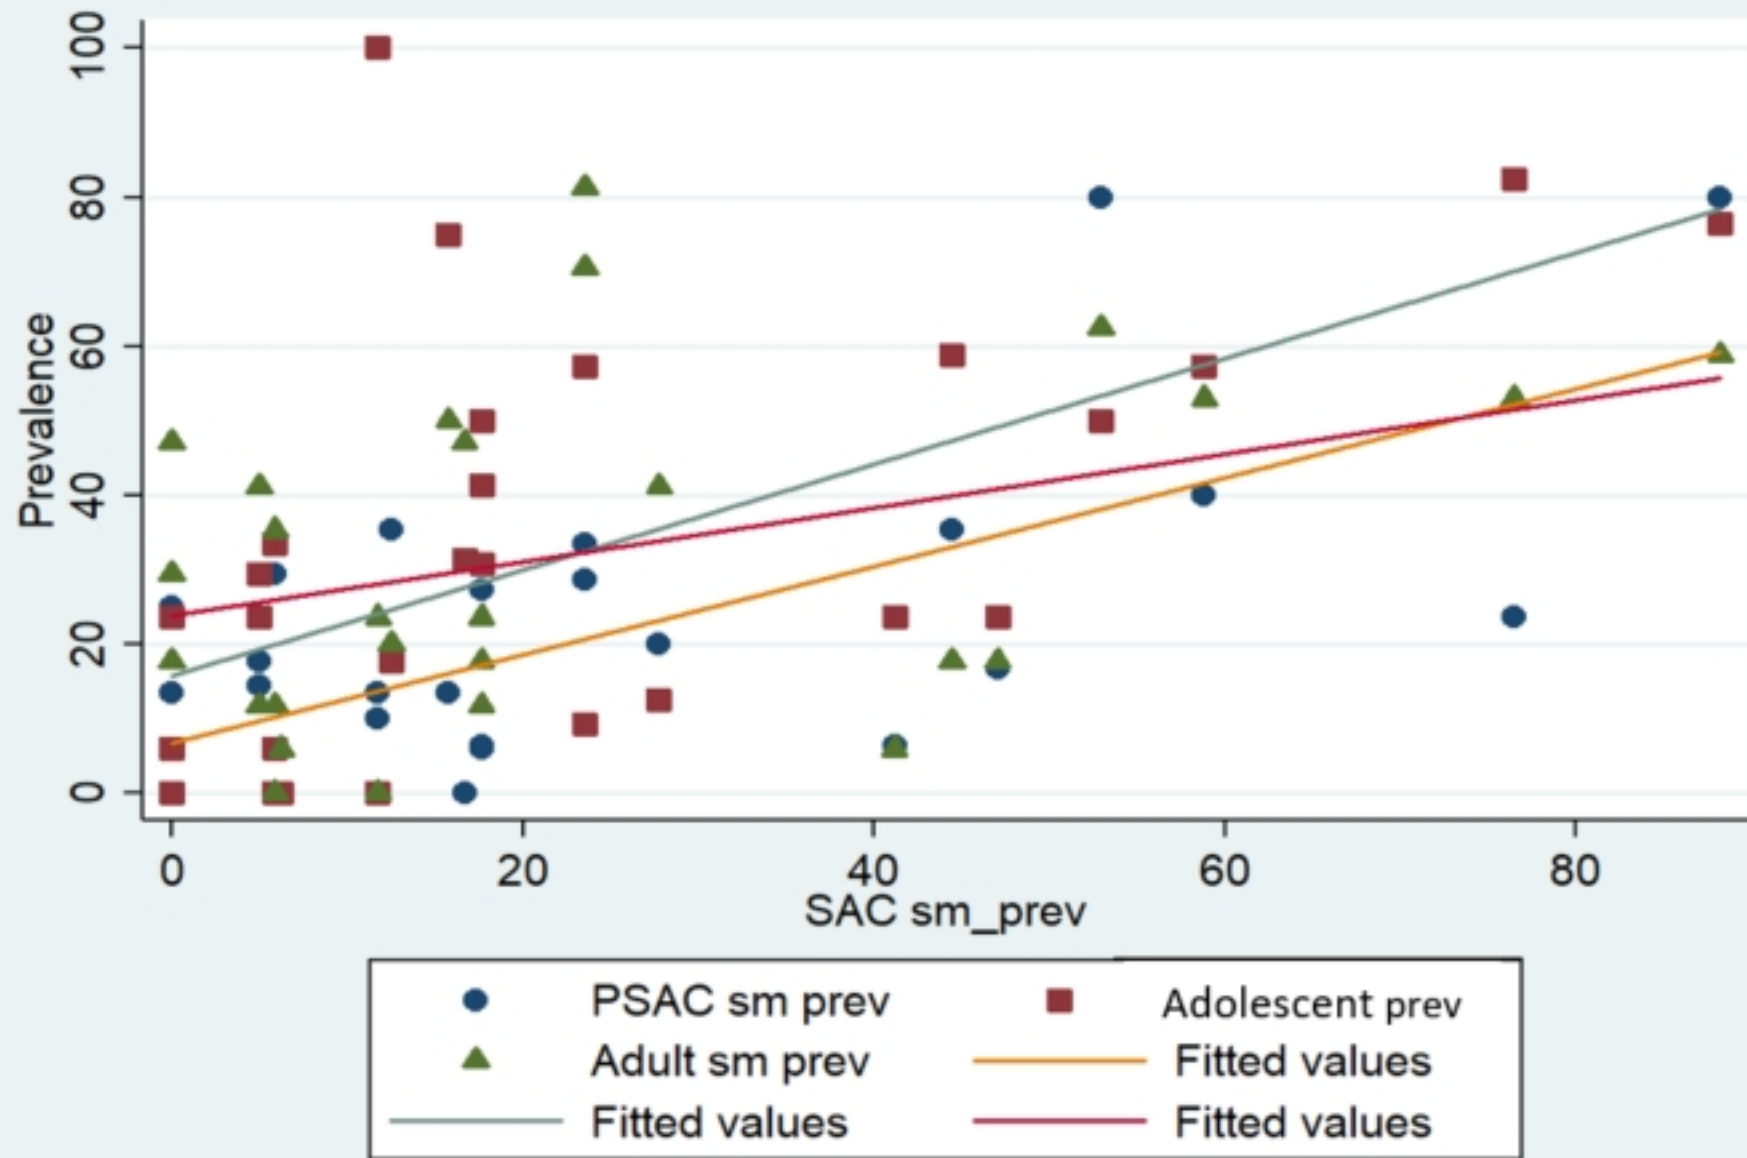

Figure 2. *Schistosoma mansoni* prevalence between age groups in Siaya County, western Kenya

figure
